# Supplementary material
Source: publisher figshare collection journal article supplement (https://gsajournals.figshare.com/ndownloader/files/19181933)
Supplement: Supplementary file 1 [file 19181933]

## Sheet: Sheet1
Sample	Population	Population Description	Sex
HG02107	ACB	AFRICAN ANCESTRY FROM BARBADOS IN THE CARIBBEAN	male
HG02332	ACB	AFRICAN ANCESTRY FROM BARBADOS IN THE CARIBBEAN	male
HG02283	ACB	AFRICAN ANCESTRY FROM BARBADOS IN THE CARIBBEAN	male
HG02108	ACB	AFRICAN ANCESTRY FROM BARBADOS IN THE CARIBBEAN	female
HG02309	ACB	AFRICAN ANCESTRY FROM BARBADOS IN THE CARIBBEAN	female
HG02095	ACB	AFRICAN ANCESTRY FROM BARBADOS IN THE CARIBBEAN	female
GM19914	ASW	AFRICAN ANCESTRY IN SOUTHWEST USA	female
GM19921	ASW	AFRICAN ANCESTRY IN SOUTHWEST USA	female
GM19920	ASW	AFRICAN ANCESTRY IN SOUTHWEST USA	male
GM19982	ASW	AFRICAN ANCESTRY IN SOUTHWEST USA	male
GM19984	ASW	AFRICAN ANCESTRY IN SOUTHWEST USA	male
GM19985	ASW	AFRICAN ANCESTRY IN SOUTHWEST USA	female
HG03133	ESN	ESAN FROM NIGERIA	male
HG03123	ESN	ESAN FROM NIGERIA	female
HG03115	ESN	ESAN FROM NIGERIA	male
HG03114	ESN	ESAN FROM NIGERIA	female
HG03124	ESN	ESAN FROM NIGERIA	male
HG03132	ESN	ESAN FROM NIGERIA	female
NA19102	YRI	YORUBA IN IBADAN, NIGERIA	female
NA18912	YRI	YORUBA IN IBADAN, NIGERIA	female
NA19213	YRI	YORUBA IN IBADAN, NIGERIA	male
GM19238	YRI	YORUBA IN IBADAN, NIGERIA	female
GM19239	YRI	YORUBA IN IBADAN, NIGERIA	male
GM19240	YRI	YORUBA IN IBADAN, NIGERIA	female
HG02811	GWD	GAMBIAN IN WESTERN DIVISION, THE GAMBIA	female
HG02623	GWD	GAMBIAN IN WESTERN DIVISION, THE GAMBIA	male
HG02594	GWD	GAMBIAN IN WESTERN DIVISION, THE GAMBIA	male
HG02810	GWD	GAMBIAN IN WESTERN DIVISION, THE GAMBIA	male
HG02595	GWD	GAMBIAN IN WESTERN DIVISION, THE GAMBIA	female
HG02624	GWD	GAMBIAN IN WESTERN DIVISION, THE GAMBIA	female
GM19440	LWK	LUHYA IN WEBUYE, KENYA	female
GM19469	LWK	LUHYA IN WEBUYE, KENYA	female
GM19023	LWK	LUHYA IN WEBUYE, KENYA	female
GM19443	LWK	LUHYA IN WEBUYE, KENYA	male
GM19444	LWK	LUHYA IN WEBUYE, KENYA	male
GM19025	LWK	LUHYA IN WEBUYE, KENYA	male
HG03097	MSL	MENDE IN SIERRA LEONE	female
HG03469	MSL	MENDE IN SIERRA LEONE	male
HG03451	MSL	MENDE IN SIERRA LEONE	male
HG03096	MSL	MENDE IN SIERRA LEONE	male
HG03452	MSL	MENDE IN SIERRA LEONE	female
HG03470	MSL	MENDE IN SIERRA LEONE	female
NA12878	CEU	CEPH/UTAH PEDIGREE 1463	female
NA12891	CEU	CEPH/UTAH PEDIGREE 1463	male
NA12892	CEU	CEPH/UTAH PEDIGREE 1463	female
GM11832	CEU	CEPH/UTAH PEDIGREE 1350	female
GM11994	CEU	CEPH/UTAH PEDIGREE 1362	female
GM12342	CEU	CEPH/UTAH PEDIGREE 1330	male
HG00330	FIN	FINNISH IN FINLAND	female
HG00270	FIN	FINNISH IN FINLAND	female
HG00353	FIN	FINNISH IN FINLAND	female
HG00271	FIN	FINNISH IN FINLAND	male
HG00329	FIN	FINNISH IN FINLAND	male
HG00351	FIN	FINNISH IN FINLAND	male
HG00251	GBR	BRITISH FROM ENGLAND AND SCOTLAND, UK	male
HG00250	GBR	BRITISH FROM ENGLAND AND SCOTLAND, UK	female
HG00100	GBR	BRITISH FROM ENGLAND AND SCOTLAND, UK	female
HG00101	GBR	BRITISH FROM ENGLAND AND SCOTLAND, UK	male
HG00260	GBR	BRITISH FROM ENGLAND AND SCOTLAND, UK	male
HG00261	GBR	BRITISH FROM ENGLAND AND SCOTLAND, UK	female
HG01784	IBS	IBERIAN POPULATIONS IN SPAIN	female
HG01761	IBS	IBERIAN POPULATIONS IN SPAIN	male
HG01756	IBS	IBERIAN POPULATIONS IN SPAIN	male
HG01757	IBS	IBERIAN POPULATIONS IN SPAIN	female
HG01762	IBS	IBERIAN POPULATIONS IN SPAIN	female
HG01783	IBS	IBERIAN POPULATIONS IN SPAIN	male
GM20587	TSI	TOSCANI IN ITALIA (TUSCANS IN ITALY)	female
GM20588	TSI	TOSCANI IN ITALIA (TUSCANS IN ITALY)	male
GM20589	TSI	TOSCANI IN ITALIA (TUSCANS IN ITALY)	female
GM20813	TSI	TOSCANI IN ITALIA (TUSCANS IN ITALY)	female
GM20814	TSI	TOSCANI IN ITALIA (TUSCANS IN ITALY)	male
GM20815	TSI	TOSCANI IN ITALIA (TUSCANS IN ITALY)	male
GM21137	GIH	GUJARATI INDIANS IN HOUSTON, TEXAS, USA	female
GM21125	GIH	GUJARATI INDIANS IN HOUSTON, TEXAS, USA	female
GM21095	GIH	GUJARATI INDIANS IN HOUSTON, TEXAS, USA	male
GM21126	GIH	GUJARATI INDIANS IN HOUSTON, TEXAS, USA	male
NA19678	MXL	MEXICAN ANCESTRY IN LOS ANGELES, CALIFORNIA, USA	female
NA19720	MXL	MEXICAN ANCESTRY IN LOS ANGELES, CALIFORNIA, USA	male
NA19788	MXL	MEXICAN ANCESTRY IN LOS ANGELES, CALIFORNIA, USA	female
GM19719	MXL	MEXICAN ANCESTRY IN LOS ANGELES, CALIFORNIA, USA	female
GM19789	MXL	MEXICAN ANCESTRY IN LOS ANGELES, CALIFORNIA, USA	male
GM19679	MXL	MEXICAN ANCESTRY IN LOS ANGELES, CALIFORNIA, USA	male
HG01971	PEL	PERUVIAN IN LIMA, PERU	female
HG01991	PEL	PERUVIAN IN LIMA, PERU	male
HG01973	PEL	PERUVIAN IN LIMA, PERU	female
HG01970	PEL	PERUVIAN IN LIMA, PERU	male
HG01974	PEL	PERUVIAN IN LIMA, PERU	male
HG01992	PEL	PERUVIAN IN LIMA, PERU	female
HG01075	PUR	PUERTO RICAN IN PUERTO RICO	male
HG01176	PUR	PUERTO RICAN IN PUERTO RICO	male
HG01167	PUR	PUERTO RICAN IN PUERTO RICO	male
HG00731	PUR	PUERTO RICAN IN PUERTO RICO	male
HG00732	PUR	PUERTO RICAN IN PUERTO RICO	female
HG00733	PUR	PUERTO RICAN IN PUERTO RICO	female
HG01133	CLM	COLOMBIAN IN MEDELLIN, COLOMBIA	male
HG01140	CLM	COLOMBIAN IN MEDELLIN, COLOMBIA	female
HG01464	CLM	COLOMBIAN IN MEDELLIN, COLOMBIA	male
HG01134	CLM	COLOMBIAN IN MEDELLIN, COLOMBIA	female
HG01139	CLM	COLOMBIAN IN MEDELLIN, COLOMBIA	male
HG01465	CLM	COLOMBIAN IN MEDELLIN, COLOMBIA	female
HG00512	CHS	HAN CHINESE SOUTH, CHINA	male
HG00513	CHS	HAN CHINESE SOUTH, CHINA	female
HG00514	CHS	HAN CHINESE SOUTH, CHINA	female
HG00472	CHS	HAN CHINESE SOUTH, CHINA	male
HG00428	CHS	HAN CHINESE SOUTH, CHINA	female
HG00623	CHS	HAN CHINESE SOUTH, CHINA	female
HG00851	CDX	CHINESE DAI IN XISHUANGBANNA, CHINA	female
HG00866	CDX	CHINESE DAI IN XISHUANGBANNA, CHINA	male
HG00867	CDX	CHINESE DAI IN XISHUANGBANNA, CHINA	female
HG01809	CDX	CHINESE DAI IN XISHUANGBANNA, CHINA	female
HG01816	CDX	CHINESE DAI IN XISHUANGBANNA, CHINA	male
HG02250	CDX	CHINESE DAI IN XISHUANGBANNA, CHINA	male
GM18553	CHB	HAN CHINESE IN BEIJING, CHINA	female
GM18623	CHB	HAN CHINESE IN BEIJING, CHINA	male
GM18622	CHB	HAN CHINESE IN BEIJING, CHINA	male
GM18552	CHB	HAN CHINESE IN BEIJING, CHINA	female
GM18555	CHB	HAN CHINESE IN BEIJING, CHINA	female
GM18557	CHB	HAN CHINESE IN BEIJING, CHINA	male
NA18988	JPT	JAPANESE IN TOKYO, JAPAN	male
NA19068	JPT	JAPANESE IN TOKYO, JAPAN	male
NA18986	JPT	JAPANESE IN TOKYO, JAPAN	male
GM18987	JPT	JAPANESE IN TOKYO, JAPAN	female
GM18991	JPT	JAPANESE IN TOKYO, JAPAN	female
GM19001	JPT	JAPANESE IN TOKYO, JAPAN	female
HG01873	KHV	KINH IN HO CHI MINH CITY, VIETNAM	male
HG02522	KHV	KINH IN HO CHI MINH CITY, VIETNAM	female
HG02026	KHV	KINH IN HO CHI MINH CITY, VIETNAM	male
HG01874	KHV	KINH IN HO CHI MINH CITY, VIETNAM	female
HG02521	KHV	KINH IN HO CHI MINH CITY, VIETNAM	male
HG02025	KHV	KINH IN HO CHI MINH CITY, VIETNAM	female
HG03616	BEB	BENGALI IN BANGLADESH	female
HG03796	BEB	BENGALI IN BANGLADESH	female
HG03007	BEB	BENGALI IN BANGLADESH	female
HG03615	BEB	BENGALI IN BANGLADESH	male
HG03797	BEB	BENGALI IN BANGLADESH	male
HG03006	BEB	BENGALI IN BANGLADESH	male
HG03727	ITU	INDIAN TELUGU IN THE UK	male
HG03722	ITU	INDIAN TELUGU IN THE UK	female
HG03864	ITU	INDIAN TELUGU IN THE UK	male
HG03721	ITU	INDIAN TELUGU IN THE UK	female
HG03725	ITU	INDIAN TELUGU IN THE UK	male
HG03863	ITU	INDIAN TELUGU IN THE UK	female
HG03684	STU	SRI LANKAN TAMIL IN THE UK	female
HG03838	STU	SRI LANKAN TAMIL IN THE UK	female
HG03741	STU	SRI LANKAN TAMIL IN THE UK	female
HG03682	STU	SRI LANKAN TAMIL IN THE UK	male
HG03740	STU	SRI LANKAN TAMIL IN THE UK	male
HG04006	STU	SRI LANKAN TAMIL IN THE UK	male
HG02603	PJL	PUNJABI IN LAHORE, PAKISTAN	male
HG02490	PJL	PUNJABI IN LAHORE, PAKISTAN	male
HG02688	PJL	PUNJABI IN LAHORE, PAKISTAN	female
HG02491	PJL	PUNJABI IN LAHORE, PAKISTAN	female
HG02604	PJL	PUNJABI IN LAHORE, PAKISTAN	female
HG02687	PJL	PUNJABI IN LAHORE, PAKISTAN	male
